# Supplementary material for: Maize Internode Autofluorescence at the Macroscopic Scale: Image Representation and Principal Component Analysis of a Series of Large Multispectral Images
Source: MDPI journal article supplement (doi:10.3390/biom13071104), 2023-07-11
Supplement: s1 [file s1]

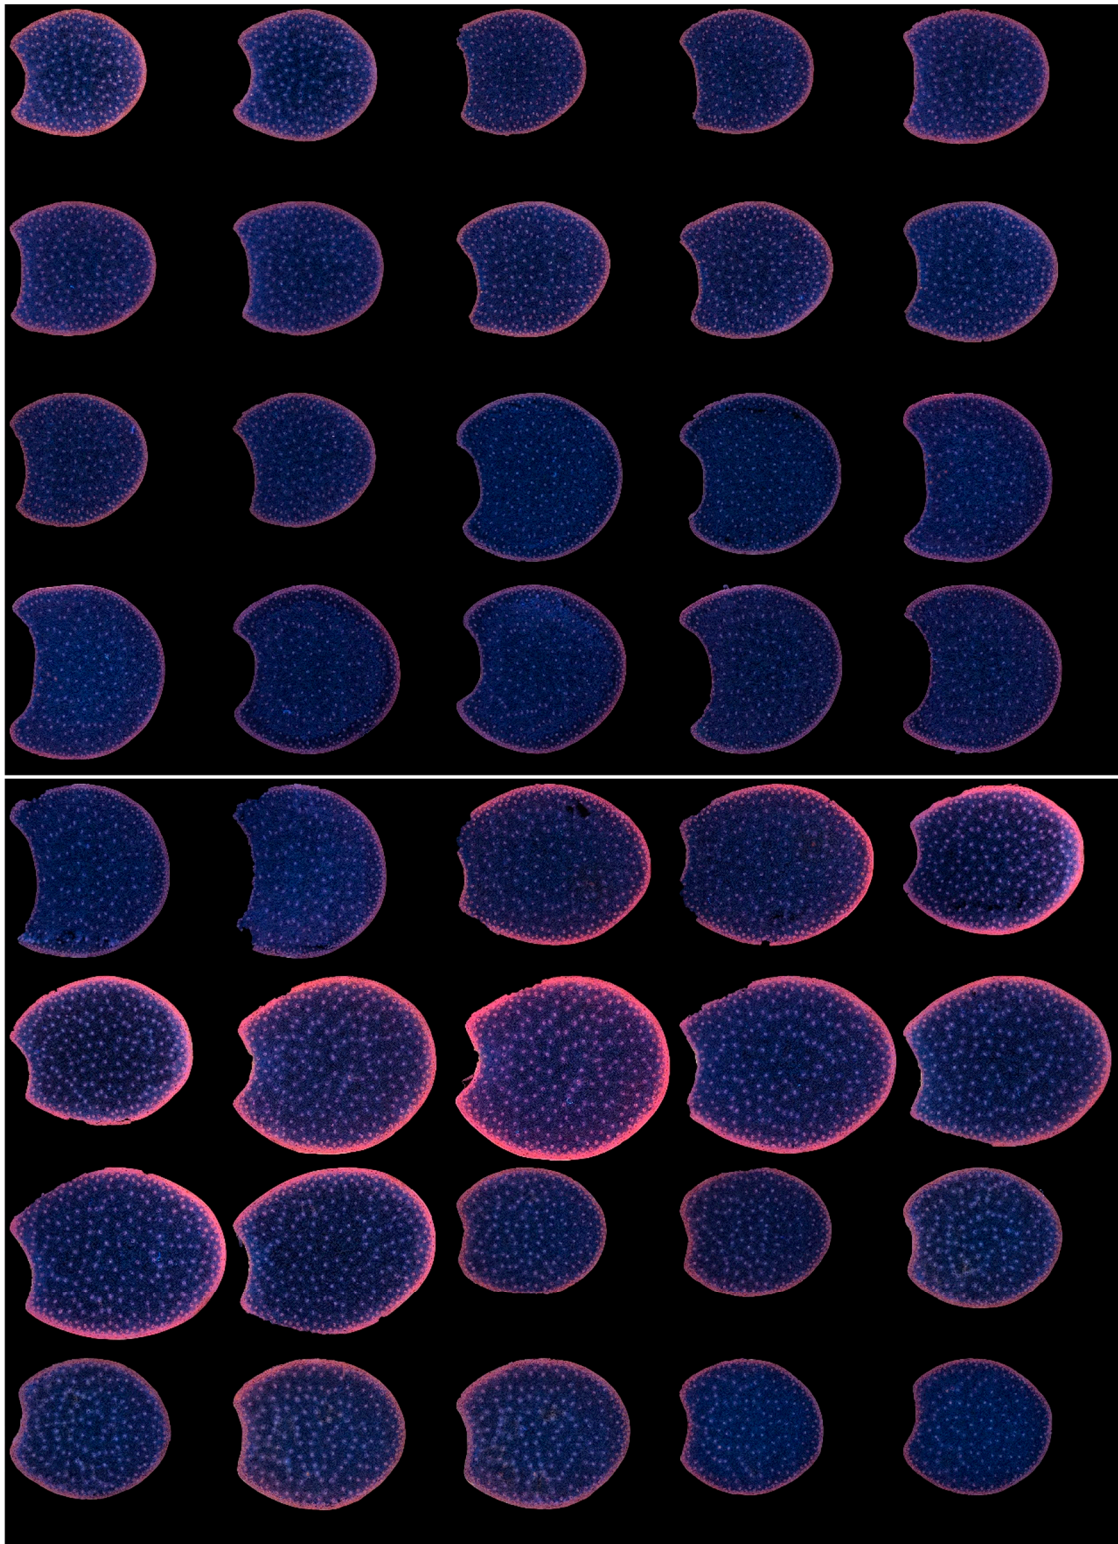

RGB composite images of macrofluorescence. Montages of the 40 images of the series. Field of view of each image montage: 7.89 cm x 11.45 cm corresponding roughly to 2 x 2 cm<sup>2</sup> per section. Colour intensities can be compared.

Montage 1: images 1 to 12: inbred line M21 with 2, 2, 3, 3 and 2 sections per internode, respectively. Images 13 to 20: inbred line M22 with 2 sections per internode. Montage 2: images 1 to 2: inbred line M22 with 2 sections per internode. images 3 to 12: inbred line M23 with 2 sections per internode. Images 13 to 20: inbred line M24 with 2 sections per internode. Only 4 internodes could be analysed for this line



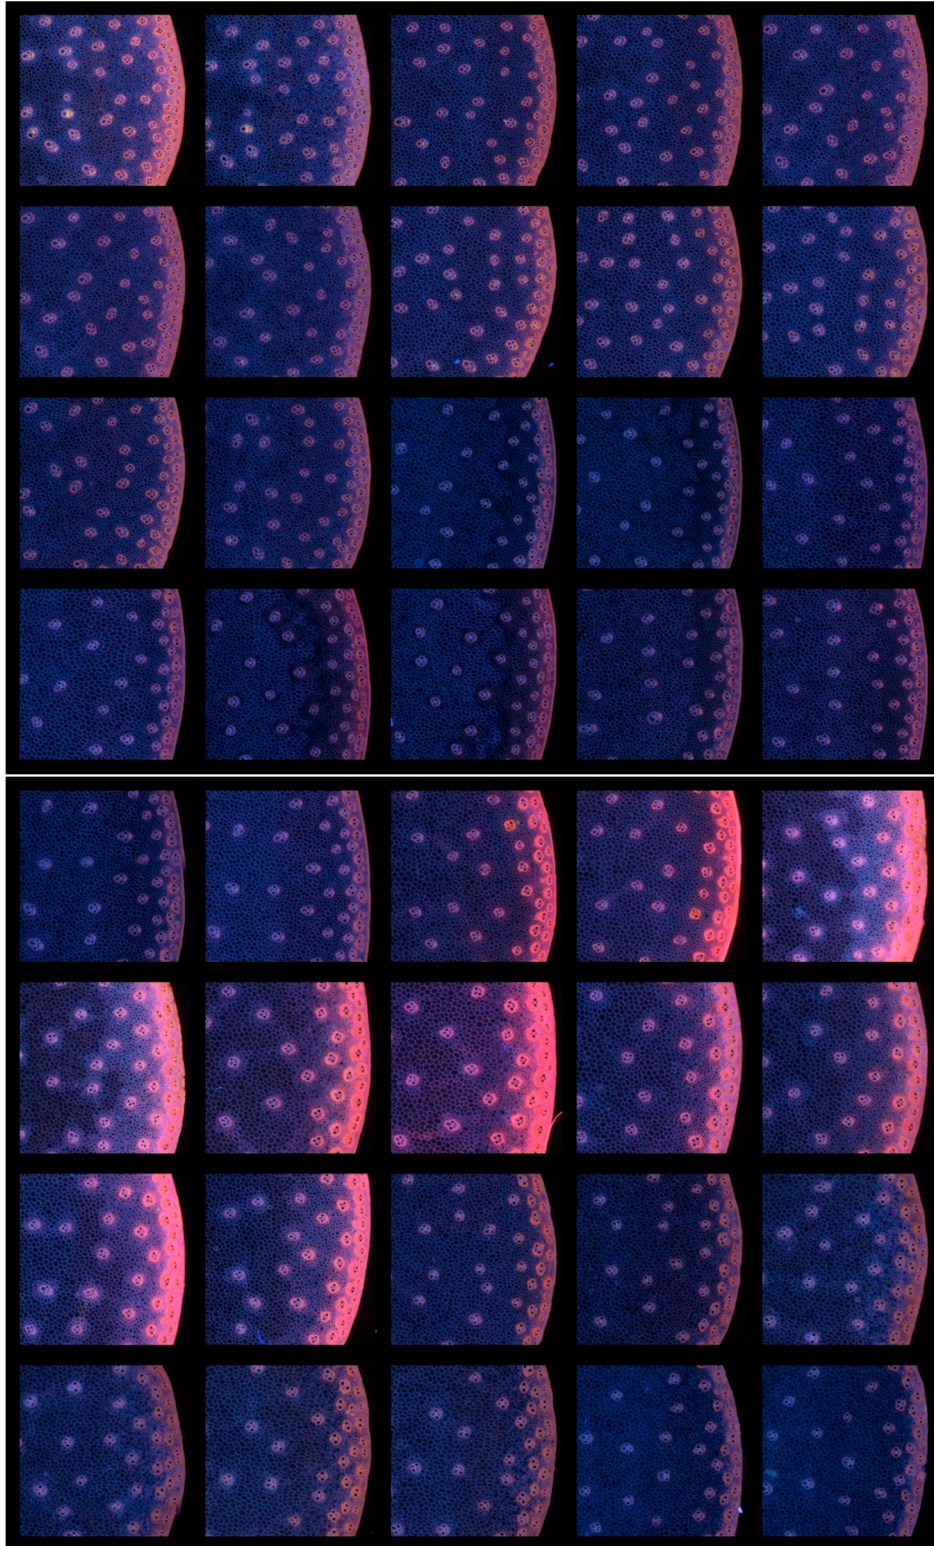

RGB composite images of macrofluorescence. Montage of the 40 rind zoomed images of the series. Fields of view: one image: 4.17\*4.17 mm<sup>2</sup>, montage: 1.89 cm x 2.28 cm. Colour intensities can be compared.

Montage 1: images 1 to 12: inbred line M21 with 2, 2, 3, 3 and 2 sections per internode, respectively. Images 13 to 20: inbred line M22 with 2 sections per internode. Montage 2: images 1 to 2: inbred line M22 with 2 sections per internode. images 3 to 12: inbred line M23 with 2 sections per internode. Images 13 to 20: inbred line M24 with 2 sections per internode. Only 4 internodes could be analysed for this line



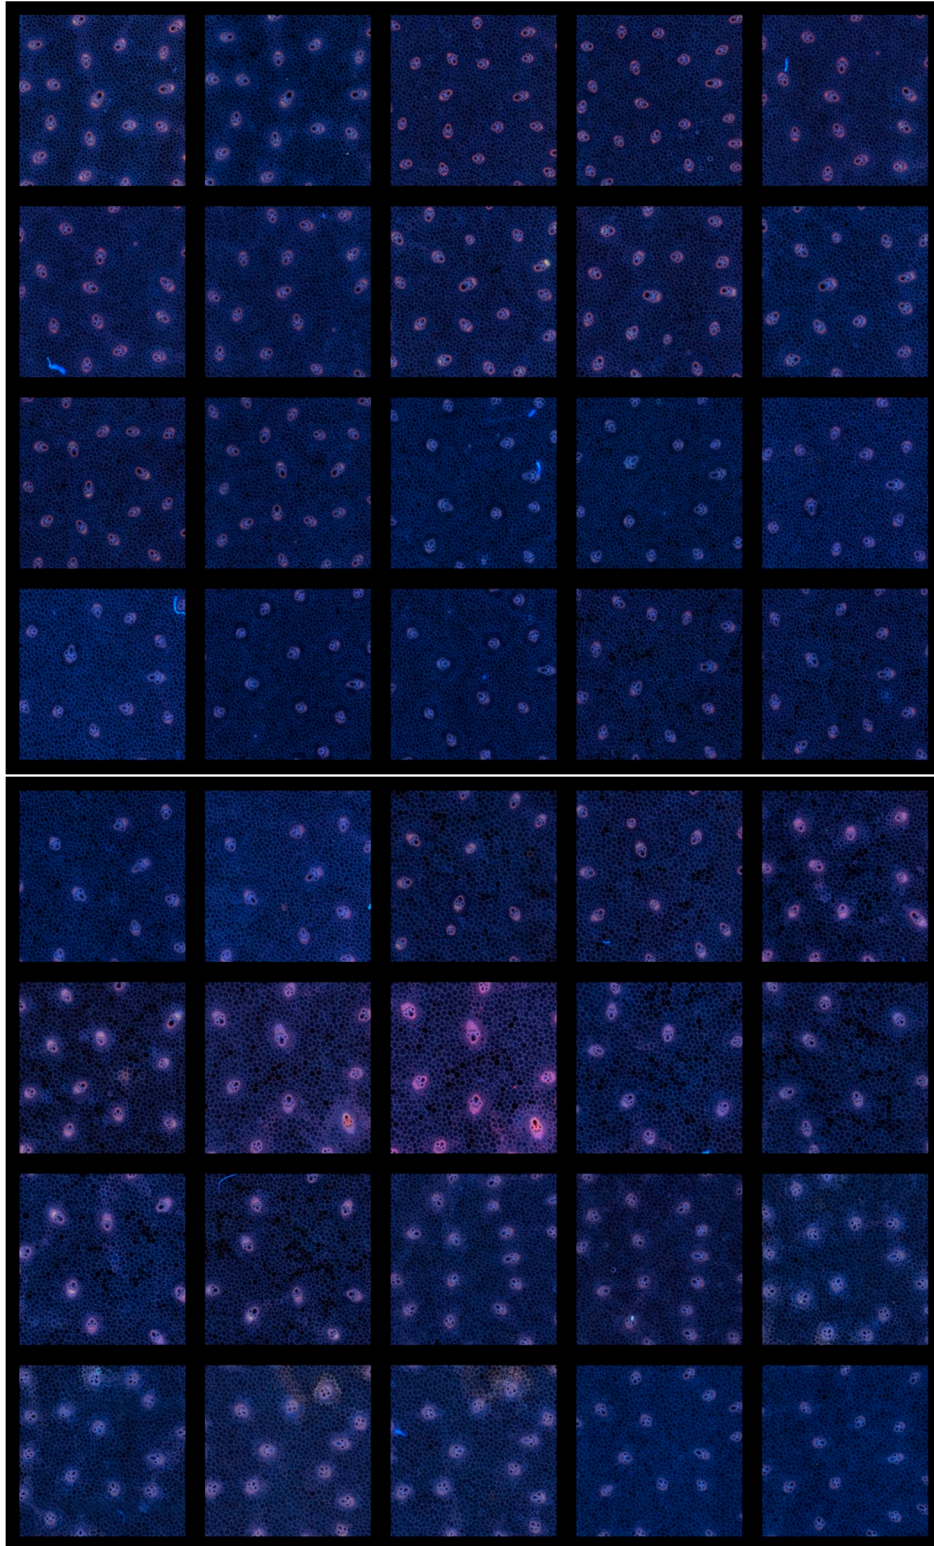

RGB composite images of macrofluorescence. Montage of the 40 centre zoomed images of the series. Fields of view: one image:  $4.17 \times 4.17 \text{ mm}^2$ , montage:  $1.89 \text{ cm} \times 2.28 \text{ cm}$ . Colour intensities can be compared.

Montage 1: images 1 to 12: inbred line M21 with 2, 2, 3, 3 and 2 sections per internode, respectively. Images 13 to 20: inbred line M22 with 2 sections per internode. Montage 2: images 1 to 2: inbred line M22 with 2 sections per internode. images 3 to 12: inbred line M23 with 2 sections per internode. Images 13 to 20: inbred line M24 with 2 sections per internode. Only 4 internodes could be analysed for this line
