# Supplementary material for: Maize Internode Autofluorescence at the Macroscopic Scale: Image Representation and Principal Component Analysis of a Series of Large Multispectral Images
Source: Biomolecules. 2023 Jul 11;13(7):1104. doi: 10.3390/biom13071104 (PMC10377703; doi:10.3390/biom13071104)
Supplement: Supplementary file 1 [file biomolecules-13-01104-s001.zip]

Archive with 6 entries (6 files):
- Supplementary1-montage.pdf
- Supplementary2-scorePCA-AveragePseudoSpectra.pdf
- Supplementary3-score1.pdf
- Supplementary4-score2.pdf
- supplementary5-score3.pdf
- supplementary6-score4.pdf
